# Supplementary material
Source: publisher site journal article supplement (https://www.dovepress.com/article/173667)
Supplement: Supplementary file 1 [file get_supplementary_file.php]

Table S1. List of International Classification of Diseases, 10th revision, German Modification (ICD-10-GM) codes used to identify cases of traumatic brain injury (TBI), number and distribution of cases identified by each code.

| ICD-10-GM Code |      | Description                                           | N      | %    |
|----------------|------|-------------------------------------------------------|--------|------|
| S02            | S020 | Fracture of vault of skull                            | 99     | 0.6  |
|                | S021 | Fracture of base of skull                             | 186    | 1.1  |
|                | S023 | Fracture of orbital floor                             | 536    | 3.2  |
|                | S027 | Multiple fractures involving skull and facial bones   | 28     | 0.2  |
|                | S028 | Fractures of other skull and facial bones             | 58     | 0.3  |
|                | S029 | Fractures of skull and facial bones, part unspecified | 14     | 0.1  |
| S04            | S04  | Injury of optic nerve and pathways                    | 1      | 0.0  |
| S06            | S060 | Concussion                                            | 11,302 | 67.5 |
|                | S061 | Traumatic cerebral oedema                             | 16     | 0.1  |
|                | S062 | Diffuse brain injury                                  | 259    | 1.5  |
|                | S063 | Focal brain injury                                    | 575    | 3.4  |
|                | S064 | Epidural haemorrhage                                  | 116    | 0.7  |
|                | S065 | Traumatic subdural haemorrhage                        | 2,051  | 12.2 |
|                | S066 | Traumatic subarachnoid haemorrhage                    | 1,128  | 6.7  |
|                | S068 | Other intracranial injuries                           | 282    | 1.7  |
|                | S069 | Intracranial injury unspecified                       | 83     | 0.5  |
| S09            | S09  | Unspecified injury of head                            | 16     | 0.1  |
| Total          |      |                                                       | 16,750 | 100  |

Table S2. List of Anatomical Therapeutical Chemical (ATC) codes used to identify dispensations of antidepressants (ADs)<sup>1</sup>.

| ATC code | Description      |
|----------|------------------|
| TCA      |                  |
| N06AA01  | Desipramin       |
| N06AA02  | Imipramin        |
| N06AA03  | Imipraminoxid    |
| N06AA04  | Clomipramin      |
| N06AA05  | Opipramol        |
| N06AA06  | Trimipramin      |
| N06AA07  | Lofepramin       |
| N06AA08  | Dibenzepin       |
| N06AA09  | Amitriptylin     |
| N06AA10  | Nortriptylin     |
| N06AA11  | Protriptylin     |
| N06AA12  | Doxepin          |
| N06AA13  | Iprindol         |
| N06AA14  | Melitracen       |
| N06AA15  | Butriptylin      |
| N06AA16  | Dosulepin        |
| N06AA17  | Amoxapin         |
| N06AA18  | Dimetacrin       |
| N06AA19  | Amineptin        |
| N06AA20  | Noxiptilin       |
| N06AA21  | Maprotilin       |
| N06AA23  | Quinupramin      |
| N06AA25  | Amitriptylinoxid |
| SSRI     |                  |
| N06AB02  | Zimeldin         |
| N06AB03  | Fluoxetin        |
| N06AB04  | Citalopram       |
| N06AB05  | Paroxetin        |
| N06AB06  | Sertralin        |
| N06AB07  | Alaproclat       |
| N06AB08  | Fluvoxamin       |
| N06AB09  | Etoferidon       |
| N06AB10  | Escitalopram     |
| NaSSA    |                  |
| N06AX03  | Mianserin        |
| N06AX11  | Mirtazapin       |
| N06AX16  | Venlafaxin       |
| MAO      |                  |
| N06AF01  | Isocarboxazid    |
| N06AF02  | Nialamid         |
| N06AF03  | Phenelzin        |
| N06AF04  | Tranlylcypromin  |
| N06AF05  | Iproniazid       |
| N06AF06  | Iproclozid       |
| N06AG02  | Moclobemid       |
| N06AG03  | Toloxaton        |

|                        |                               |
|------------------------|-------------------------------|
| NARI                   |                               |
| N06AX18                | Reboxetin                     |
| N06AX09                | Viloxazin                     |
| Herbal antidepressants |                               |
| N06AH01                | Hypericum                     |
| N06AH10                | Various                       |
| N06AP01                | St. John's Wort               |
| N06AP51                | St. John's Wort, combinations |
| Other antidepressants  |                               |
| N06AX01                | Oxatriptan                    |
| N06AX02                | Tryptophan                    |
| N06AX04                | Nomifensin                    |
| N06AX05                | Trazodon                      |
| N06AX06                | Nefazodon                     |
| N06AX07                | Minaprin                      |
| N06AX08                | Bifemelan                     |
| N06AX10                | Oxaflozan                     |
| N06AX12                | Bupropion                     |
| N06AX13                | Medifoxamin                   |
| N06AX14                | Tianeptin                     |
| N06AX15                | Pivagabin                     |
| N06AX17                | Milnacipran                   |
| N06AX19                | Gepiron                       |
| N06AX21                | Duloxetine                    |
| N06AX22                | Agomelatin                    |
| N06AX23                | Desvenlafaxin                 |
| N06AX24                | Vilazodon                     |
| N06AX26                | Vortioxetin                   |
| N06AX27                | Pipofezin                     |

---

<sup>1</sup> Abbreviations: tricyclics (TCA), selective serotonin reuptake inhibitors (SSRI), selective serotonin-noradrenaline reuptake inhibitors (SSNRI), noradrenergic and specific serotonergic antidepressants (NASSA), noradrenaline reuptake inhibitors (NARI), monoamine oxidase inhibitors (MAO).



Figure S1. Definition of the different exposure periods in cases and in controls based on the interval between index date (ID) and the end of the most recent prior treatment episode.

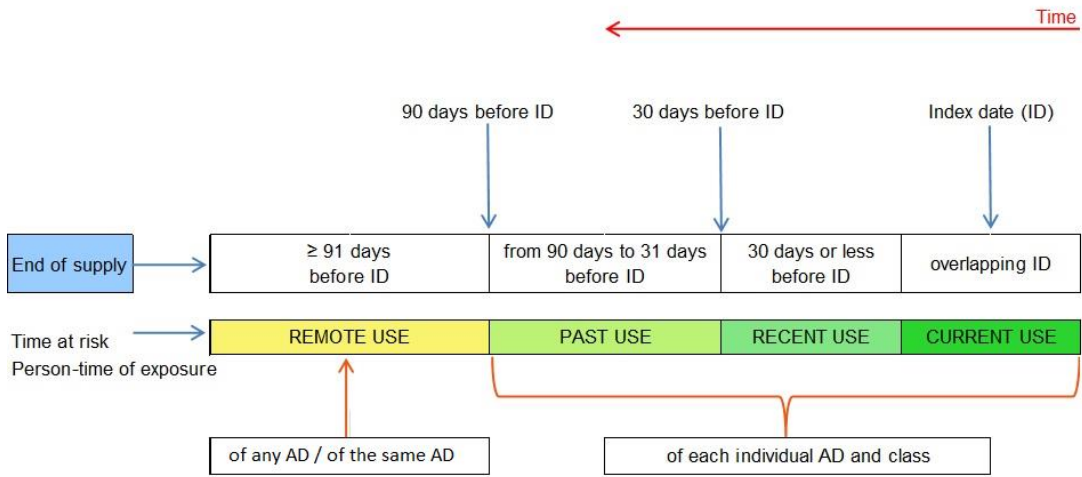

Table S3. ICD-10 GM Codes used for the calculation of the “Charlson Comorbidity Index” according to Quan et al.<sup>23</sup>

| Disease                                                                        | ICD-10-GM codes                                                                                                                                      |
|--------------------------------------------------------------------------------|------------------------------------------------------------------------------------------------------------------------------------------------------|
| Myocardial infarction                                                          | I21x                                                                                                                                                 |
| Congestive heart failure                                                       | I099, I110, I130, I132, I255, I420, I425-I429, I43x, I50x, P290                                                                                      |
| Dementia                                                                       | F00x-F03x, F051, G30x, G311                                                                                                                          |
| Chronic pulmonary disease                                                      | I278, I279, J40x-J47x, J60x-J67x, J684, J701, J703                                                                                                   |
| Rheumatic disease                                                              | M05x, M06x, M315, M32x- M34x, M351, M353, M360                                                                                                       |
| Mild liver disease                                                             | B18x, K700, K701-K703, K709, K713-K715, K717, K73x, K74x, K760, K762-K764, K768, K769, Z944                                                          |
| Moderate / severe liver disease                                                | I850, I864, I982, K704, K711, K721, K729, K765-K767                                                                                                  |
| Diabetes with chronic complication                                             | E102, E103, E104, E105, E107, E112, E113, E114, E115, E117, E122, E123, E124, E125, E127, E132, E133, E134, E135, E137, E142, E143, E144, E145, E147 |
| Paraplegia / hemiplegia                                                        | G041, G114, G801, G802, G81x, G82x, G830-G834, G839                                                                                                  |
| Renal disease                                                                  | I120, I131, N032, N033, N034, N035, N036, N037, N052, N053, N054, N055, N056, N057, N18, N19, N250, Z49, Z940, Z992                                  |
| Any malignancy, incl. lymphoma and leukemia, except malignant neoplasm of skin | C00x-C26x, C30x-C34x, C37x-C41x, C43x, C45x-C58x, C60x-C76x, C81x-C86x, C88x, C90x-C97x                                                              |
| Metastatic solid tumor                                                         | C77x-C80x                                                                                                                                            |
| HIV / AIDS                                                                     | B20-B24x                                                                                                                                             |

Table S4. ICD-10 GM Codes used to identify co-morbidities.

| Disease                                                                   | ICD-10-GM codes                                                                                                                                                                                                                                                                                           |
|---------------------------------------------------------------------------|-----------------------------------------------------------------------------------------------------------------------------------------------------------------------------------------------------------------------------------------------------------------------------------------------------------|
| Myocardial infarction                                                     | I21x ,I22x, I23x, I241, I252x                                                                                                                                                                                                                                                                             |
| Other coronary heart disease                                              | I20x, I24x (excl. I241), I25x (excl. I252 and I255)                                                                                                                                                                                                                                                       |
| Atrial fibrillation                                                       | I48x                                                                                                                                                                                                                                                                                                      |
| Other cardiac arrhythmias and conduction disorders                        | I44x, I45x, I460, I469, I47x-I49x, R000, R001, R008, T821, Z450, Z950                                                                                                                                                                                                                                     |
| Valvular disorders and endocarditis                                       | A520, I011, I05x-I08x, I091, I098, I33x-I39x, Q230-Q233, Z952-Z954                                                                                                                                                                                                                                        |
| Pericardial disorders                                                     | I010, I092, I30x-I32x                                                                                                                                                                                                                                                                                     |
| Myocarditis                                                               | I102, I40x, I41x, I514                                                                                                                                                                                                                                                                                    |
| Peripheral vascular disease                                               | I70x, I71x, I731, I738, I739, I771, I790, I792, K551, K558, K559, Z958, Z959                                                                                                                                                                                                                              |
| Hypertension                                                              | I10x-I13x, I15x                                                                                                                                                                                                                                                                                           |
| Pain                                                                      | F454x, F6280, G43x, G44x, G50x, G52x, G53x, G54x, G55x, G56x, G57x, G58x, G59x, G58x, G59x, G60x, G61X, G62x, G63x, G64, M43x, M45x, M46x, M47x, M47x, M48x, M49x, M50x, M51x, M53x, M54x, M792x, M81x, M82x, M89x,                                                                                       |
| Dementia                                                                  | F00x-F03x, F051, G30x, G311, G3182                                                                                                                                                                                                                                                                        |
| Chronic pulmonary disease                                                 | J40x-J47x, J60x-J67x, J684, J701, J703                                                                                                                                                                                                                                                                    |
| Pulmonary circulation disorders                                           | I26x, I27x, I280, I288, I289                                                                                                                                                                                                                                                                              |
| Rheumatoid arthritis, other arthropathies and connective tissue disorders | L940, L941, L942, M05x, M06x, M08x, M120, M123, M30x, M310-M313, M32x-M35x, M45x, M461, M468, M469                                                                                                                                                                                                        |
| Liver insufficiency                                                       | B18x, I850, I864, I982, K70x, K71x, K72x, K74x, K76x, Z944                                                                                                                                                                                                                                                |
| Parkinson's disease and movement disorders                                | G20x-G26x, R25x-R27x (excl. R263), R290, F95x, G10,                                                                                                                                                                                                                                                       |
| Depression                                                                | F32x, F33x, F341, F412, F432                                                                                                                                                                                                                                                                              |
| Diabetes                                                                  | E10x-E14x                                                                                                                                                                                                                                                                                                 |
| Anxiety disorders                                                         | F40x-F41x                                                                                                                                                                                                                                                                                                 |
| Bipolar disorder                                                          | F30x-F31x                                                                                                                                                                                                                                                                                                 |
| Obsessive compulsive disorder                                             | F42                                                                                                                                                                                                                                                                                                       |
| Delirium                                                                  | F05, F104, F114, F124, F134, F144, F154, F164, F174, F184, F194                                                                                                                                                                                                                                           |
| Schizophrenia                                                             | F20x                                                                                                                                                                                                                                                                                                      |
| Renal insufficiency                                                       | I120, I131, N18x, N19x, N250, Z490-Z492, Z940, Z992                                                                                                                                                                                                                                                       |
| Cancer                                                                    | C00x-C26x, C30x-C34x, C37x-C41x, C43x, C45x-C58x, C60x-C76x- C80x, C81x-C85x, C88x, C90x-C97x                                                                                                                                                                                                             |
| Obesity                                                                   | E66x                                                                                                                                                                                                                                                                                                      |
| Alcohol abuse                                                             | F10x, G312, G621, G721, I426, K292, K70x, K860, T51x, Z502,                                                                                                                                                                                                                                               |
| Drug abuse                                                                | F11x-F19x                                                                                                                                                                                                                                                                                                 |
| Smoking                                                                   | F17x                                                                                                                                                                                                                                                                                                      |
| Osteoporosis and other diseases of bone density and structure             | M80x-M85x                                                                                                                                                                                                                                                                                                 |
| Senility and nursing home residence /residential care                     | EBM 03001 or coded hospital discharge to a nursing home                                                                                                                                                                                                                                                   |
| Syncope and dizziness                                                     | R42, R55x, R296                                                                                                                                                                                                                                                                                           |
| Vision disorders                                                          | H25x, H26x, H40x, H42x, H53x, H54x                                                                                                                                                                                                                                                                        |
| Infectious diseases                                                       | A00x-B99x, G00x-G07x, I00x-I02x, I301, I320, I33x, I38x, I400, J00x-J22x, J36x, J390, K35x, K37x, K570, K572, K574, K578, K61x, K630, K650, K659, K67x, K750, K751, K800, K803, K804, K810, K819, K830, L00x-L03x, L05x-L08x, M00x, M01x, M86x, N10x, N12x, N151, N30x, N341, N390, N41x, N45x, N70x-N77x |
| Hip or pelvis fracture                                                    | S32x, S720-S722                                                                                                                                                                                                                                                                                           |
| Other fractures                                                           | S223, S2231, S2232, S224x, S42x, S52x, S521x, S522x, S523x, S524, S525x, S526, S62x, S72, S82x, S92x, S430x-S433, S530, S531, S531x S630, S630x, S831X                                                                                                                                                    |
| Dyslipidemia                                                              | E78x                                                                                                                                                                                                                                                                                                      |

Table S5. Odds Ratio (OR) with 95% confidence interval (95% CI) of traumatic brain injury in current, recent and past users of individual antidepressants (AD)<sup>1</sup> compared with remote users of any AD. Treatment episodes estimated based on the dispensed DDDs.

|                                   | Cases<br>(N= 16,750) |       | Controls<br>(N= 1,673,320) |      | Matched OR <sup>2</sup><br>(95% CI) | Adjusted OR <sup>3</sup><br>(95% CI) |
|-----------------------------------|----------------------|-------|----------------------------|------|-------------------------------------|--------------------------------------|
|                                   | N                    | %     | N                          | %    |                                     |                                      |
| Remote use of any AD <sup>4</sup> | 8,432                | 50.3  | 1,004,327                  | 60.0 | 1.00 (- -)                          | 1.00 (- -)                           |
| <b>TCAs</b>                       |                      |       |                            |      |                                     |                                      |
| Doxepin                           |                      |       |                            |      |                                     |                                      |
| Current use                       | 121                  | 0.72  | 13,720                     | 0.82 | 0.61 (0.47 - 0.77)                  | 0.74 (0.58 - 0.95)                   |
| Recent use                        | 107                  | 0.64  | 14,044                     | 0.84 | 0.59 (0.43 - 0.80)                  | 0.71 (0.52 - 0.96)                   |
| Past use                          | 129                  | 0.77  | 16,365                     | 0.98 | 0.68 (0.50 - 0.93)                  | 0.80 (0.59 - 1.10)                   |
| Amitriptyline                     |                      |       |                            |      |                                     |                                      |
| Current use                       | 435                  | 2.60  | 36,877                     | 2.20 | 1.60 (1.45 - 1.77)                  | 1.41 (1.28 - 1.56)                   |
| Recent use                        | 288                  | 1.72  | 26,857                     | 1.61 | 1.47 (1.31 - 1.66)                  | 1.36 (1.20 - 1.53)                   |
| Past use                          | 280                  | 1.67  | 31,708                     | 1.89 | 1.19 (1.06 - 1.35)                  | 1.13 (1.00 - 1.28)                   |
| Opipramol                         |                      |       |                            |      |                                     |                                      |
| Current use                       | 207                  | 1.24  | 26,617                     | 1.59 | 1.05 (0.91 - 1.21)                  | 1.06 (0.92 - 1.21)                   |
| Recent use                        | 136                  | 0.81  | 18,837                     | 1.13 | 0.98 (0.83 - 1.17)                  | 1.02 (0.86 - 1.21)                   |
| Past use                          | 137                  | 0.82  | 22,298                     | 1.33 | 0.83 (0.70 - 0.98)                  | 0.88 (0.74 - 1.05)                   |
| Trimipramine                      |                      |       |                            |      |                                     |                                      |
| Current use                       | 103                  | 0.61  | 9,864                      | 0.59 | 1.41 (1.16 - 1.71)                  | 1.34 (1.10 - 1.64)                   |
| Recent use                        | 92                   | 0.55  | 11,276                     | 0.67 | 1.11 (0.90 - 1.37)                  | 1.10 (0.89 - 1.35)                   |
| Past use                          | 91                   | 0.54  | 15,177                     | 0.91 | 0.81 (0.66 - 0.99)                  | 0.83 (0.67 - 1.02)                   |
| <b>SSRIs</b>                      |                      |       |                            |      |                                     |                                      |
| Sertraline                        |                      |       |                            |      |                                     |                                      |
| Current use                       | 362                  | 2.16  | 19,068                     | 1.14 | 2.55 (2.29 - 2.83)                  | 1.84 (1.65 - 2.05)                   |
| Recent use                        | 36                   | 0.21  | 2,294                      | 0.14 | 2.12 (1.53 - 2.95)                  | 1.56 (1.12 - 2.18)                   |
| Past use                          | 38                   | 0.23  | 2,525                      | 0.15 | 2.00 (1.45 - 2.76)                  | 1.54 (1.12 - 2.13)                   |
| Citalopram                        |                      |       |                            |      |                                     |                                      |
| Current use                       | 2,223                | 13.27 | 113,732                    | 6.80 | 2.64 (2.52 - 2.77)                  | 1.92 (1.82 - 2.02)                   |
| Recent use                        | 398                  | 2.38  | 22,479                     | 1.34 | 2.41 (2.18 - 2.67)                  | 1.80 (1.62 - 1.99)                   |
| Past use                          | 334                  | 1.99  | 21,703                     | 1.30 | 2.07 (1.85 - 2.31)                  | 1.60 (1.43 - 1.79)                   |
| Paroxetine                        |                      |       |                            |      |                                     |                                      |
| Current use                       | 92                   | 0.55  | 6,411                      | 0.38 | 1.89 (1.54 - 2.33)                  | 1.65 (1.34 - 2.03)                   |
| Recent use                        | 20                   | 0.12  | 1,248                      | 0.07 | 2.12 (1.37 - 3.31)                  | 1.90 (1.22 - 2.96)                   |
| Past use                          | 14                   | 0.08  | 1,477                      | 0.09 | 1.25 (0.74 - 2.12)                  | 1.17 (0.69 - 1.99)                   |
| Fluoxetine                        |                      |       |                            |      |                                     |                                      |
| Current use                       | 71                   | 0.42  | 5,299                      | 0.32 | 1.79 (1.41 - 2.26)                  | 1.50 (1.18 - 1.90)                   |
| Recent use                        | 20                   | 0.12  | 1,034                      | 0.06 | 2.59 (1.66 - 4.04)                  | 2.17 (1.39 - 3.39)                   |
| Past use                          | 18                   | 0.11  | 1,120                      | 0.07 | 2.14 (1.34 - 3.41)                  | 1.98 (1.24 - 3.16)                   |
| Escitalopram                      |                      |       |                            |      |                                     |                                      |
| Current use                       | 190                  | 1.13  | 9,886                      | 0.59 | 2.60 (2.25 - 3.01)                  | 1.83 (1.58 - 2.12)                   |
| Recent use                        | 33                   | 0.20  | 1,644                      | 0.10 | 2.73 (1.93 - 3.86)                  | 2.08 (1.47 - 2.95)                   |
| Past use                          | 18                   | 0.11  | 1,707                      | 0.10 | 1.42 (0.89 - 2.26)                  | 1.12 (0.70 - 1.79)                   |
| <b>NASSA</b>                      |                      |       |                            |      |                                     |                                      |
| Mirtazapine                       |                      |       |                            |      |                                     |                                      |
| Current use                       | 833                  | 4.97  | 76,968                     | 4.60 | 1.46 (1.36 - 1.57)                  | 1.05 (0.97 - 1.13)                   |
| Recent use                        | 329                  | 1.96  | 26,656                     | 1.59 | 1.69 (1.51 - 1.88)                  | 1.28 (1.15 - 1.44)                   |
| Past use                          | 287                  | 1.71  | 25,705                     | 1.54 | 1.51 (1.34 - 1.70)                  | 1.20 (1.07 - 1.36)                   |
| <b>SSNRI</b>                      |                      |       |                            |      |                                     |                                      |
| Duloxetine                        |                      |       |                            |      |                                     |                                      |
| Current use                       | 212                  | 1.27  | 10,889                     | 0.65 | 2.57 (2.23 - 2.94)                  | 1.89 (1.64 - 2.17)                   |
| Recent use                        | 50                   | 0.30  | 3,300                      | 0.20 | 2.03 (1.54 - 2.69)                  | 1.59 (1.20 - 2.10)                   |
| Past use                          | 37                   | 0.22  | 3,055                      | 0.18 | 1.62 (1.17 - 2.25)                  | 1.28 (0.92 - 1.77)                   |
| Venlafaxine                       |                      |       |                            |      |                                     |                                      |
| Current use                       | 271                  | 1.62  | 13,419                     | 0.80 | 2.63 (2.33 - 2.97)                  | 1.88 (1.66 - 2.13)                   |
| Recent use                        | 51                   | 0.30  | 3,321                      | 0.20 | 2.02 (1.53 - 2.66)                  | 1.55 (1.17 - 2.05)                   |
| Past use                          | 32                   | 0.19  | 2,536                      | 0.15 | 1.66 (1.17 - 2.35)                  | 1.30 (0.92 - 1.85)                   |

<sup>1</sup> Abbreviations: tricyclics (TCA), selective serotonin reuptake inhibitors (SSRI), selective serotonin-noradrenaline reuptake inhibitors (SSNRI), noradrenergic and specific serotonergic antidepressants (NASSA), noradrenaline reuptake inhibitors (NARI), monoamine oxidase inhibitors (MAO).

<sup>2</sup> Adjusted for age, sex and length of follow-up by matching.

<sup>3</sup> Model adjusted for myocardial infarction, other coronary heart disease, atrial fibrillation, other cardiac arrhythmias and conduction disorders, valvular disorders and endocarditis, pericardial disorders, myocarditis, peripheral vascular disease, hypertension, dementia, chronic pulmonary disease, pulmonary circulation disorders, rheumatic arthritis/ collagen vascular disease, liver disease, Parkinson's disease, other extrapyramidal and movement disorders, depression, diabetes, renal failure, cancer (except malignant neoplasm of skin), obesity, alcohol abuse, drug abuse, osteoporosis and other disorders of bone density and structure, syncope, dizziness and tendency to fall, vision disorders, dyslipidemia, bipolar disorders, schizophrenia, smoking, anxiety disorders, obsessive compulsive disorders, other movement disorders, pain, infectious diseases, delirium, insulin, antidiabetic medications, antithrombotic medications, cardiac glycosides, anti-arrhythmic medications, other antihypertensive medications, diuretics, vasodilators, beta-adrenergic agonists, calcium antagonists, ACE inhibitors, angiotensin II antagonists, lipid lowering medications, hormone therapy, glucocorticoids, anti-parkinson medications, respiratory medications, non-steroidal anti-inflammatory medications, antipsychotics, antiepileptic medications, anxiolytics, hypnotics and sedatives, muscle relaxants, number of medications (1 to 4; 5 to 8, 9 and more), hospitalized time ( $\leq 5\%$ ;  $> 5\%$ ), Charlson Comorbidity Index ( $\leq 2$ ;  $> 2$ ), nursing home residence.

<sup>4</sup> Reference category.



Table S6. Odds Ratio (OR) with 95% confidence interval (95% CI) of traumatic brain injury in current, recent and past users of antidepressants (ADs) compared with current use of TCAs.

| Use of AD <sup>6</sup>             |         | Matched OR <sup>2</sup><br>(95% CI) | Adjusted OR <sup>3</sup><br>(95% CI) |
|------------------------------------|---------|-------------------------------------|--------------------------------------|
| Current use of TCA <sup>1</sup>    |         | 1.00 (- -)                          | 1.00 (- -)                           |
| SSRI                               |         |                                     |                                      |
|                                    | Current | 1.93                                | 1.82 - 2.05                          |
|                                    | Recent  | 1.22                                | 1.00 - 1.50                          |
|                                    | Past    | 1.16                                | 0.98 - 1.37                          |
| NASSA                              |         |                                     |                                      |
|                                    | Current | 1.18                                | 1.09 - 1.27                          |
|                                    | Recent  | 1.14                                | 0.93 - 1.39                          |
|                                    | Past    | 1.05                                | 0.88 - 1.26                          |
| SSNRI                              |         |                                     |                                      |
|                                    | Current | 1.91                                | 1.73 - 2.10                          |
|                                    | Recent  | 1.22                                | 0.81 - 1.83                          |
|                                    | Past    | 0.93                                | 0.63 - 1.37                          |
| MAO                                |         |                                     |                                      |
|                                    | Current | 0.80                                | 0.46 - 1.38                          |
|                                    | Recent  | 3.04                                | 0.97 - 9.52                          |
|                                    | Past    | 1.28                                | 0.32 - 5.16                          |
| NARI                               |         |                                     |                                      |
|                                    | Current | 1.69                                | 1.07 - 2.67                          |
|                                    | Recent  | 1.56                                | 0.39 - 6.32                          |
|                                    | Past    | 0.57                                | 0.08 - 4.07                          |
| Other AD                           |         |                                     |                                      |
|                                    | Current | 1.57                                | 1.25 - 1.98                          |
|                                    | Recent  | 1.20                                | 0.60 - 2.42                          |
|                                    | Past    | 1.49                                | 0.86 - 2.59                          |
| Multiple AD                        |         |                                     |                                      |
|                                    | Current | 1.99                                | 1.83 - 2.15                          |
|                                    | Recent  | 1.22                                | 0.58 - 2.58                          |
|                                    | Past    | 1.14                                | 0.70 - 1.87                          |
| Current switching use <sup>5</sup> |         | 1.97                                | 1.81 - 2.15                          |

<sup>1</sup> Reference category.

<sup>2</sup> Adjusted for age, sex and length of follow up by matching.

<sup>3</sup> Model adjusted for myocardial infarction, other coronary heart disease, atrial fibrillation, other cardiac arrhythmias and conduction disorders, valvular disorders and endocarditis, pericardial disorders, myocarditis, peripheral vascular disease, hypertension, dementia, chronic pulmonary disease, pulmonary circulation disorders, rheumatic arthritis/ collagen vascular disease, liver disease, Parkinson`s disease, other extrapyramidal and movement disorders, depression, diabetes, renal failure, cancer (except malignant neoplasm of skin), obesity, alcohol abuse, drug abuse, osteoporosis and other disorders of bone density and structure, syncope, dizziness and tendency to fall, vision disorders, dyslipidemia, bipolar disorders, schizophrenia, smoking, anxiety disorders, obsessive compulsive disorders, other movement disorders, pain, infectious diseases, delirium, insulin, antidiabetic medications, antithrombotic medications, cardiac glycosides, anti-arrhythmic medications, other antihypertensive medications, diuretics, vasodilators, beta-adrenergic agonists, calcium antagonists, ACE inhibitors, angiotensin II antagonists, lipid lowering medications, hormone therapy, glucocorticoids, anti-parkinson medications, respiratory medications, non-steroidal anti-inflammatory medications, antipsychotics, antiepileptic medications, anxiolytics, hypnotics and sedatives, muscle relaxants, number of medications (1 to 4; 5 to 8, 9 and more), hospitalized time ( $\leq 5\%$ ;  $> 5\%$ ), Charlson Comorbidity Index ( $\leq 2$ ;  $> 2$ ), nursing home residence.

<sup>4</sup> Not calculated owing to cell with 0 cases.

<sup>5</sup> Current switching use: current use of one ATD class with recent use of a different ATD class.

<sup>6</sup> Abbreviations: tricyclics (TCA), selective serotonin reuptake inhibitors (SSRI), selective serotonin-noradrenaline reuptake inhibitors (SSNRI), noradrenergic and specific serotonergic antidepressants (NASSA), noradrenaline reuptake inhibitors (NARI), monoamine oxidase inhibitors (MAO).

Figure S2. Odds Ratio (OR) with 95% confidence interval (95% CI) of traumatic brain injury in current, recent and past users of antidepressants (ADs)<sup>1</sup> compared with remote users of any AD by age<sup>2</sup>.

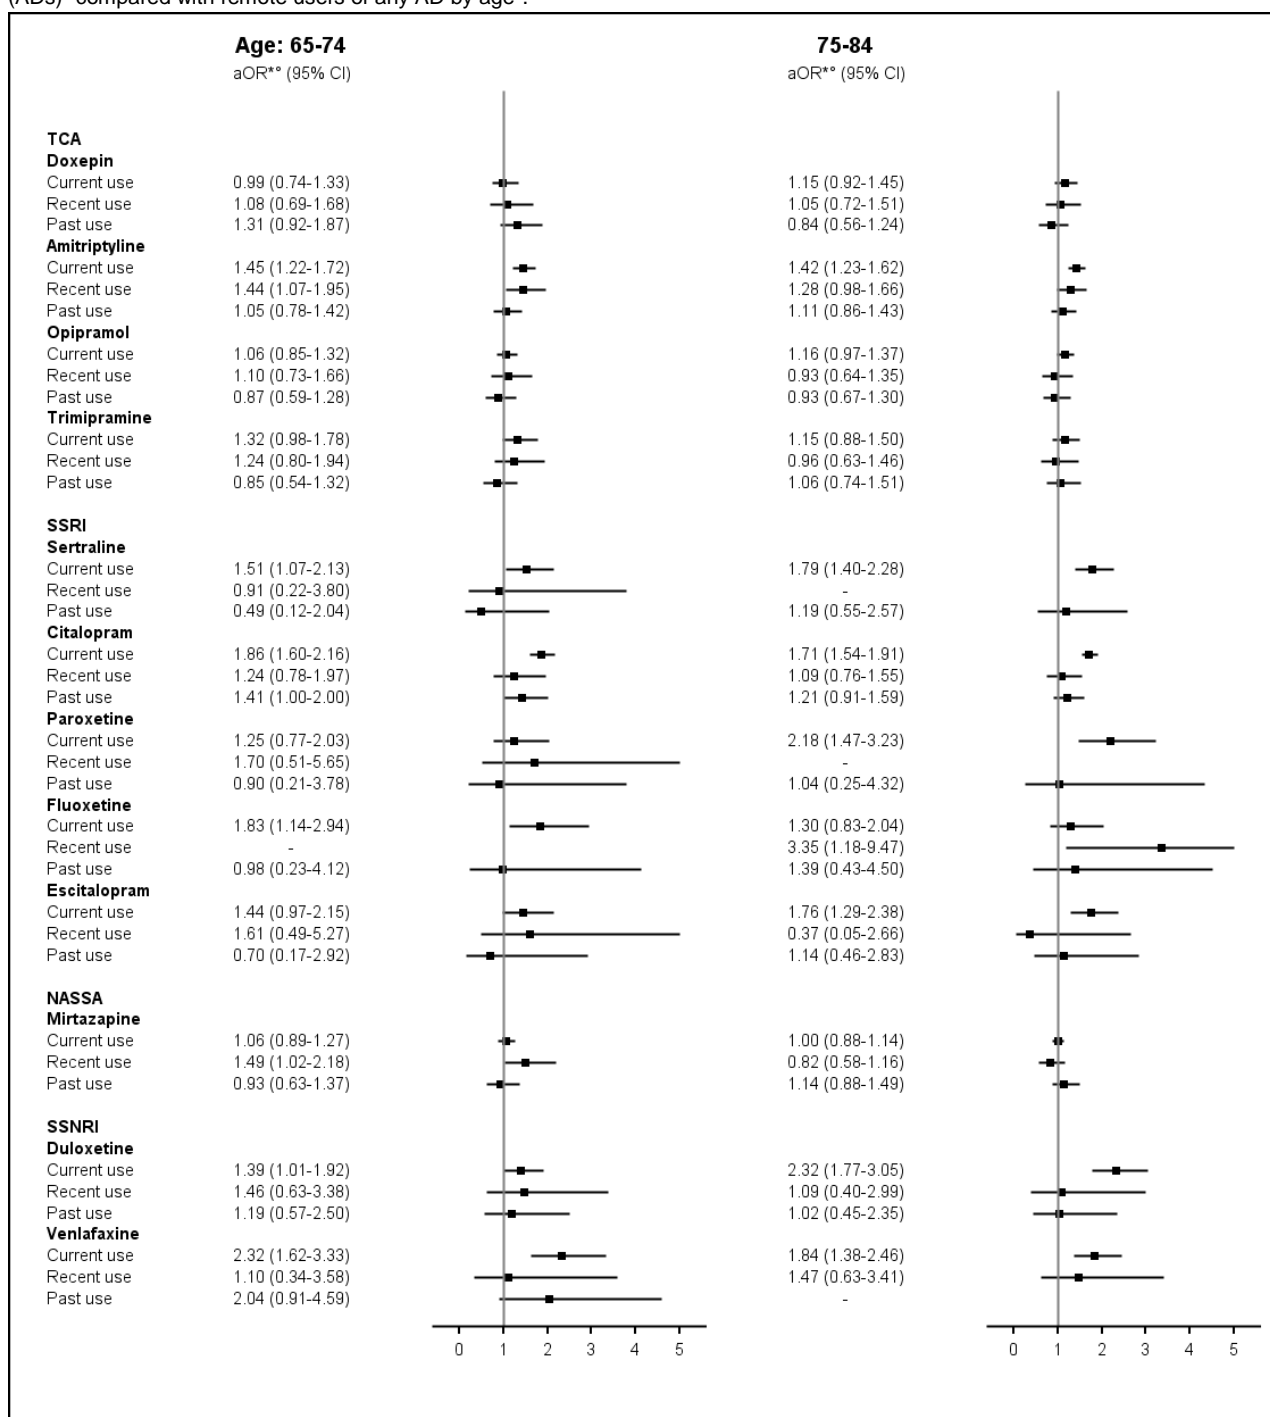

<sup>1</sup> Abbreviations: tricyclics (TCA), selective serotonin reuptake inhibitors (SSRI), selective serotonin-noradrenaline reuptake inhibitors (SSNRI), noradrenergic and specific serotonergic antidepressants (NASSA), noradrenaline reuptake inhibitors (NARI), monoamine oxidase inhibitors (MAO). <sup>2</sup> The model did not converge in the group of age 85 years and above.

\*° Model adjusted for myocardial infarction, other coronary heart disease, atrial fibrillation, other cardiac arrhythmias and conduction disorders, valvular disorders and endocarditis, pericardial disorders, myocarditis, peripheral vascular disease, hypertension, dementia, chronic pulmonary disease, pulmonary circulation disorders, rheumatic arthritis/ collagen vascular disease, liver disease, Parkinson's disease, other extrapyramidal and movement disorders, depression, diabetes, renal failure, cancer (except malignant neoplasm of skin), obesity, alcohol abuse, drug abuse, osteoporosis and other disorders of bone density and structure, syncope, dizziness and tendency to fall, vision disorders, dyslipidemia, bipolar disorders, schizophrenia, smoking, anxiety disorders, obsessive compulsive disorders, other movement disorders, pain, infectious diseases, delirium, insulin, antidiabetic medications, antithrombotic medications, cardiac glycosides, anti-arrhythmic medications, other antihypertensive medications, diuretics, vasodilators, beta-adrenergic agonists, calcium antagonists, ACE inhibitors, angiotensin II antagonists, lipid lowering medications, hormone therapy, glucocorticoids, anti-parkinson medications, respiratory medications, non-steroidal anti-inflammatory medications, antipsychotics, antiepileptic medications, anxiolytics, hypnotics and sedatives, muscle relaxants, number of medications (1 to 4; 5 to 8, 9 and more), hospitalized time ( $\leq 5\%$ ;  $> 5\%$ ), Charlson Comorbidity Index ( $\leq 2$ ;  $> 2$ ), nursing home residence.

Figure S3. Odds Ratio (OR) with 95% confidence interval (95% CI) of traumatic brain injury in current, recent and past users of antidepressants (ADs) compared with remote users of any AD by sex.

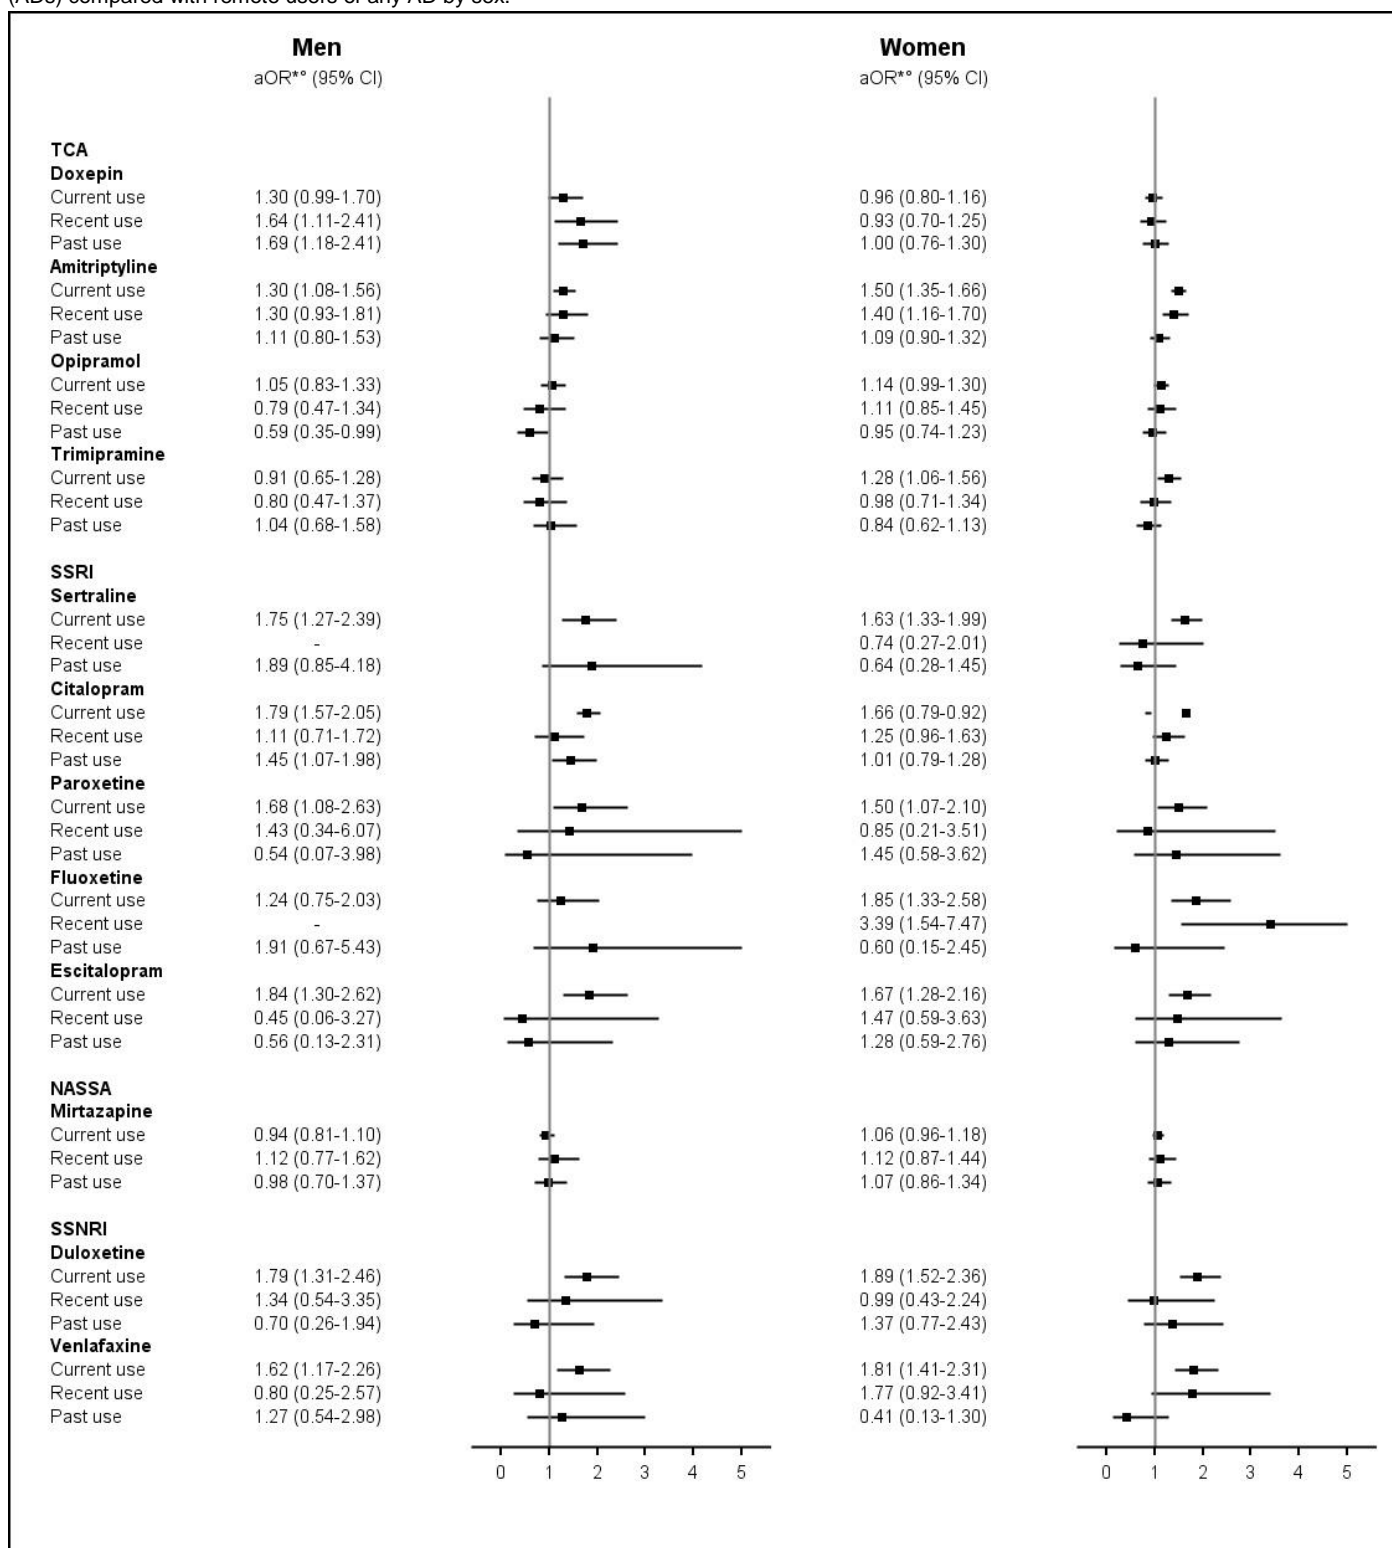

<sup>1</sup> Abbreviations: tricyclics (TCA), selective serotonin reuptake inhibitors (SSRI), selective serotonin-noradrenaline reuptake inhibitors (SSNRI), noradrenergic and specific serotonergic antidepressants (NASSA), noradrenaline reuptake inhibitors (NARI), monoamine oxidase inhibitors (MAO).

\*\* Model adjusted for myocardial infarction, other coronary heart disease, atrial fibrillation, other cardiac arrhythmias and conduction disorders, valvular disorders and endocarditis, pericardial disorders, myocarditis, peripheral vascular disease, hypertension, dementia, chronic pulmonary disease, pulmonary circulation disorders, rheumatic arthritis/ collagen vascular disease, liver disease, Parkinson's disease, other extrapyramidal and movement disorders, depression, diabetes, renal failure, cancer (except malignant neoplasm of skin), obesity, alcohol abuse, drug abuse, osteoporosis and other disorders of bone density and structure, syncope, dizziness and tendency to fall, vision disorders, dyslipidemia, bipolar disorders, schizophrenia, smoking, anxiety disorders, obsessive compulsive disorders, other movement disorders, pain, infectious diseases, delirium, insulin, antidiabetic medications, antithrombotic medications, cardiac glycosides, anti-arrhythmic medications, other antihypertensive medications, diuretics, vasodilators, beta-adrenergic agonists, calcium antagonists, ACE inhibitors, angiotensin II antagonists, lipid lowering medications, hormone therapy, glucocorticoids, anti-parkinson medications, respiratory medications, non-steroidal anti-inflammatory medications, antipsychotics, antiepileptic medications, anxiolytics, hypnotics and sedatives, muscle relaxants, number of medications (1 to 4; 5 to 8, 9 and more), hospitalized time ( $\leq 5\%$ ;  $> 5\%$ ), Charlson Comorbidity Index ( $\leq 2$ ;  $> 2$ ), nursing home residence.

Figure S4. Odds Ratio (OR) with 95% confidence interval (95% CI) of traumatic brain injury in current, recent and past users of antidepressants (ADs)<sup>1</sup> compared with remote users of any AD, by depression<sup>2</sup>.

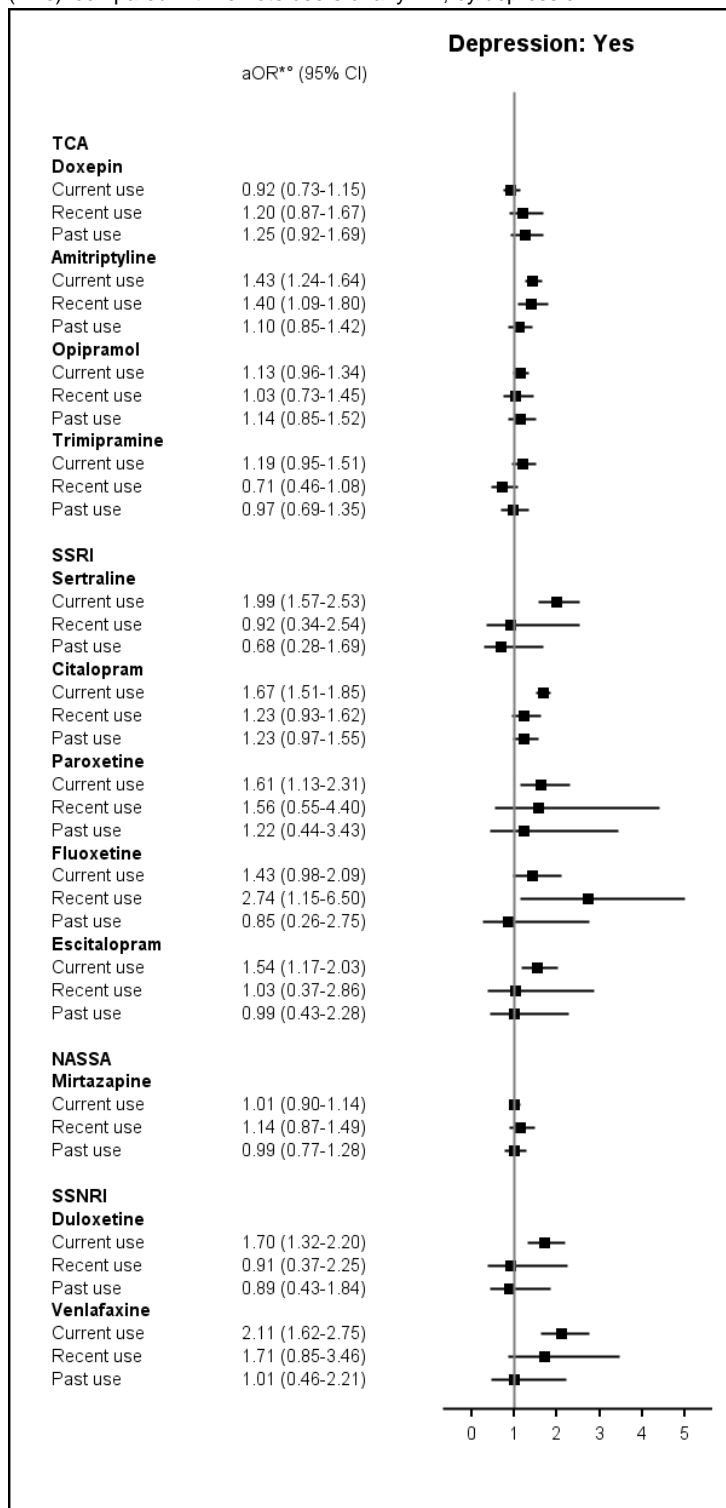

<sup>1</sup> Abbreviations: tricyclics (TCA), selective serotonin reuptake inhibitors (SSRI), selective serotonin-noradrenaline reuptake inhibitors (SSNRI), noradrenergic and specific serotonergic antidepressants (NASSA), noradrenaline reuptake inhibitors (NARI), monoamine oxidase inhibitors (MAO). <sup>2</sup> The model did not converge in the group without depression.

\*\* Model adjusted for myocardial infarction, other coronary heart disease, atrial fibrillation, other cardiac arrhythmias and conduction disorders, valvular disorders and endocarditis, pericardial disorders, myocarditis, peripheral vascular disease, hypertension, dementia, chronic pulmonary disease, pulmonary circulation disorders, rheumatic arthritis/ collagen vascular disease, liver disease, Parkinson's disease, other extrapyramidal and movement disorders, depression, diabetes, renal failure, cancer (except malignant neoplasm of skin), obesity, alcohol abuse, drug abuse, osteoporosis and other disorders of bone density and structure, syncope, dizziness and tendency to fall, vision disorders, dyslipidemia, bipolar disorders, schizophrenia, smoking, anxiety disorders, obsessive compulsive disorders, other movement disorders, pain, infectious diseases, delirium, insulin, antidiabetic medications, antithrombotic medications, cardiac glycosides, anti-arrhythmic medications, other antihypertensive medications, diuretics, vasodilators, beta-adrenergic agonists, calcium antagonists, ACE inhibitors, angiotensin II antagonists, lipid lowering medications, hormone therapy, glucocorticoids, anti-parkinson medications, respiratory medications, non-steroidal anti-inflammatory medications, antipsychotics, antiepileptic medications, anxiolytics, hypnotics and sedatives, muscle relaxants, number of medications (1 to 4; 5 to 8, 9 and more), hospitalized time ( $\leq 5\%$ ;  $> 5\%$ ), Charlson Comorbidity Index ( $\leq 2$ ;  $> 2$ ), nursing home residence.
